# Supplementary material for: A 1,200-year perspective of 21st century drought in southwestern North America
Source: HighWire-hosted journal article supplement (doi:10.1073/pnas.0911197107), 2010-12-07
Supplement: pnas.0911197107_SI.pdf [file pnas.0911197107_SI.pdf]

# Supporting Information

## Woodhouse et al. 10.1073/pnas.0911197107

### SI Text

**Details on ECHO-g model.** Goosse et al. (1) and Osborn et al. (2) have suggested that earlier ECHO-g simulations may have overestimated warming during the medieval period. To provide a more conservative estimate, the simulation results presented here were initiated from the cold conditions of the year AD 1700. In general, the results of this initiation produce estimates of medieval warming which are more consistent with other simulations (3). A time-series of annual temperature variations for the Intermountain West for the period AD 1000–1990 was constructed by averaging the annual surface temperature output from the 10 ECHO-g simulation grid points extending from 40–34°N and from 104–124°W and used for this study.

**Details on drought variables and temperature.** Both drought variables—summer Palmer Drought Severity Index (PDSI) and water year streamflow—strongly reflect cool season moisture. The largest contribution to water year streamflow in the Colorado River basin is winter snowpack, and the PDSI is a lagged measure of drought that reflects moisture conditions in the previous seasons (4). In addition, annual ring widths of Southwestern moisture-sensitive trees most strongly reflect variations in cool season climate (5). Instrumental data suggest that major droughts tend to persist across seasons (6), although in the Southwest, the degree to which warm-season and cool-season precipitation are out of phase is still being investigated (7, 8). Both PDSI and water year streamflow integrate temperature in their measures or calculation, but in both cases, moisture is the dominant variable reflected in the reconstruction. The temperature component in the reconstructions has not been isolated in either case, but understanding the degree to which temperatures were elevated during drought would be useful in considering analogues for future drought.

**Additional details on PDSI and temperature reconstructions.** Southwest Drought Area Index (DAI) is based on a set of gridded ( $0.5^\circ \times 0.5^\circ$ ) reconstructions of summer Palmer Drought Severity

Index (PDSI) (9, 10). The Southwest DAI is computed as the percentage of gridpoints each year experiencing mild-to-severe drought ( $PDSI \leq -1.0$ ) in the region west of  $97.5^\circ W$  between  $27.5^\circ N$  and  $40^\circ N$ . The Colorado Plateau temperature reconstruction was generated with tree-ring data from sites where trees are limited by average annual maximum temperatures (11). The series length (average of 384 yr) and conservative detrending used to compile the chronologies in the reconstruction help preserve the low-frequency information, but it is likely that centennial-scale variability is not well-represented.

**Details of drought impacts on water resources.** With regard to water resources in Colorado headwaters regions, drought conditions began in the fall of 1999 and peaked in 2002, with some of the lowest snowpacks and runoffs recorded in the Colorado River and other basins (12). In the upper Colorado River basin, 7 of the last 10 annual flows are below the long-term median, a frequency matched only twice before—during the 1930s and 1950s droughts (13). The story is similar for the headwaters of Rio Grande, where annual inflows into Elephant Butte Reservoir, the largest reservoir on the Rio Grande north of the US/Mexico border, have been below average for ten of the last 13 yr (14). In northern Mexico, drought conditions in the cool and warm seasons have persisted with limited relief since 1994 (15), but as in other regions have been particularly severe during the cool season since 1999 (16). In southern California, high precipitation in 2005 broke a drought that began in 1999, but since 2007 drought conditions have been widespread and severe (17). The impacts of the recent drought years have been most pronounced on cool-season precipitation deficits, which are critical for surface-water systems that require snowmelt runoff to fill reservoirs. Warm-season precipitation has also been affected, but in areas where the summer monsoon is a major contributor to annual moisture and a critical factor in water demand, precipitation has been more variable, with record wet conditions in 2006 over many locations, and extremely dry conditions in 2003 (18).

1. Goosse H, Crowley TJ, Zorita E, Ammann CM, Renssen H, and Driesschaert E (2005) Modelling the climate of the last millennium: What causes the differences between simulations? *Geophys Res Lett* 32:L06710, doi:10.1029/2005GL022368.
2. Osborn T, Raper SCB, and Briffa KR (2006) Simulated climate change during the last 1,000 years: Comparing the ECHO-g general circulation model with the MAGICC simple climate model. *Clim Dynam* 27:185–197, doi:10.1007/s00382-006-0129-5.
3. Stevens MB, González-Rouco JF and Beltrami H (2008) North American climate of the last millennium: Underground temperatures and model comparison. *J Geophys Res* 113:F01008, doi:10.1029/2006JF000705.
4. Cook ER, Meko DM, Stahle DW, and Cleaveland MK (1999) Drought reconstructions for the continental United States. *J Climate* 12:1145–1162.
5. Stahle, et al. (2009) Early 21<sup>st</sup> century drought in Mexico. *Eos Trans Amer Geophys Union* 90:89–100.
6. Cook ER, Seager R, Cane MA, and Stahle DW (2007) North American drought: Reconstructions, causes, and consequences. *Earth-Sci Rev* 81:93–134.
7. Gutzler DS (2000) Covariability of spring snowpack and summer rainfall across the southwest United States. *J Climate* 13:4018–4027.
8. Castro CL, Pielke RA Sr, Adegoke, JO, Schubert SD, and Pegion PJ (2007) Investigation of the summer climate of the contiguous United States and Mexico using the Regional Atmospheric Modeling System (RAMS). Part II: Model climate variability. *J Climate* 20:3866–3887.
9. Palmer WC (1965) Meteorological drought. *Weather Bur Res Pap* 45, US Department of Commerce, 37 Washington, DC, 58
10. Cook ER, Seager R, Heim RR, Vose RS, Herweijer C, and Woodhouse CA (2009) Megadroughts in North America: Placing IPCC projections of hydroclimatic change in a long-term paleoclimate context. *J Quaternary Sci* doi:10.002/jqs.1303.
11. Salzer MW and Kipfmüller KF (2005) Reconstructed temperature and precipitation on a millennial timescale from tree rings in the southern Colorado Plateau, USA. *Climatic Change* 70: 465–487.
12. Pielke RA, et al. (2005) Drought 2002 in Colorado—an unprecedented drought or a routine drought? *Pure Appl Geophys* 162:1455–1479.
13. Bureau of Reclamation (2009) Colorado River Basin Natural Flow and Salt Data. <http://www.usbr.gov/lc/region/g4000/NaturalFlow/index.html>
14. Rio Grande Drought Watch (2009) <http://el Paso.tamu.edu/research/Drought%20Watch/Drought%20Watch%20Press%20Release%20and%20Graph%202009-06-23.pdf>
15. Stahle, et al (2009) Cool- and warm-season precipitation reconstructions over western New Mexico *J Climate* 22:3729–3750, 10.1175/2008JCLI2752.1.
16. NCDC North American Drought Monitor (2009) <http://www.ncdc.noaa.gov/oa/climate/monitoring/drought/nadm/>
17. Western Regional Climate Center (2009) WestMap Climate Analysis & Mapping Toolbox [http://www.cfa.dri.edu/Westmap/Westmap\\_home.php](http://www.cfa.dri.edu/Westmap/Westmap_home.php)
18. National Weather Service (2009) Monsoon Statistics. <http://www.wrh.noaa.gov/twc/monsoon/monsoon.php>
19. Meko DM, et al. (2007) Medieval drought in the upper Colorado River basin. *Geophys Res Lett* 34m L17075, doi: 10.1029/2007GL029988.
